# Supplementary material for: Dynamics of Influenza Seasonality at Sub-Regional Levels in India and Implications for Vaccination Timing
Source: PubMed Central journal article supplement (PMC4418715; doi:10.1371/journal.pone.0124122), 2015-05-04
Supplement: pone.0124122.s003.pdf [file pone.0124122.s003.pdf]

Figure S1-A. Phylogenetic analysis of HA1 gene of seasonal A/H1N1 isolates.

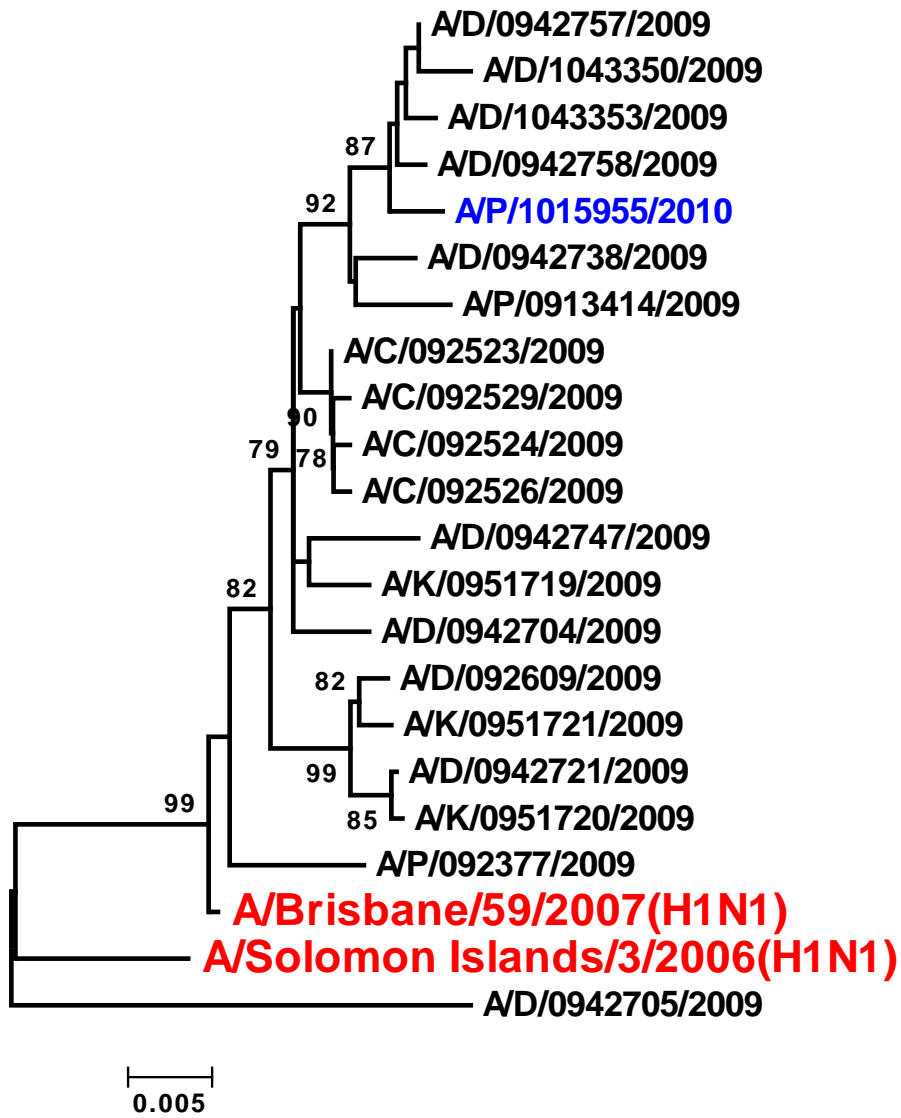

Figure S1-B. Phylogenetic Analysis of HA1 gene of H3N2 isolates

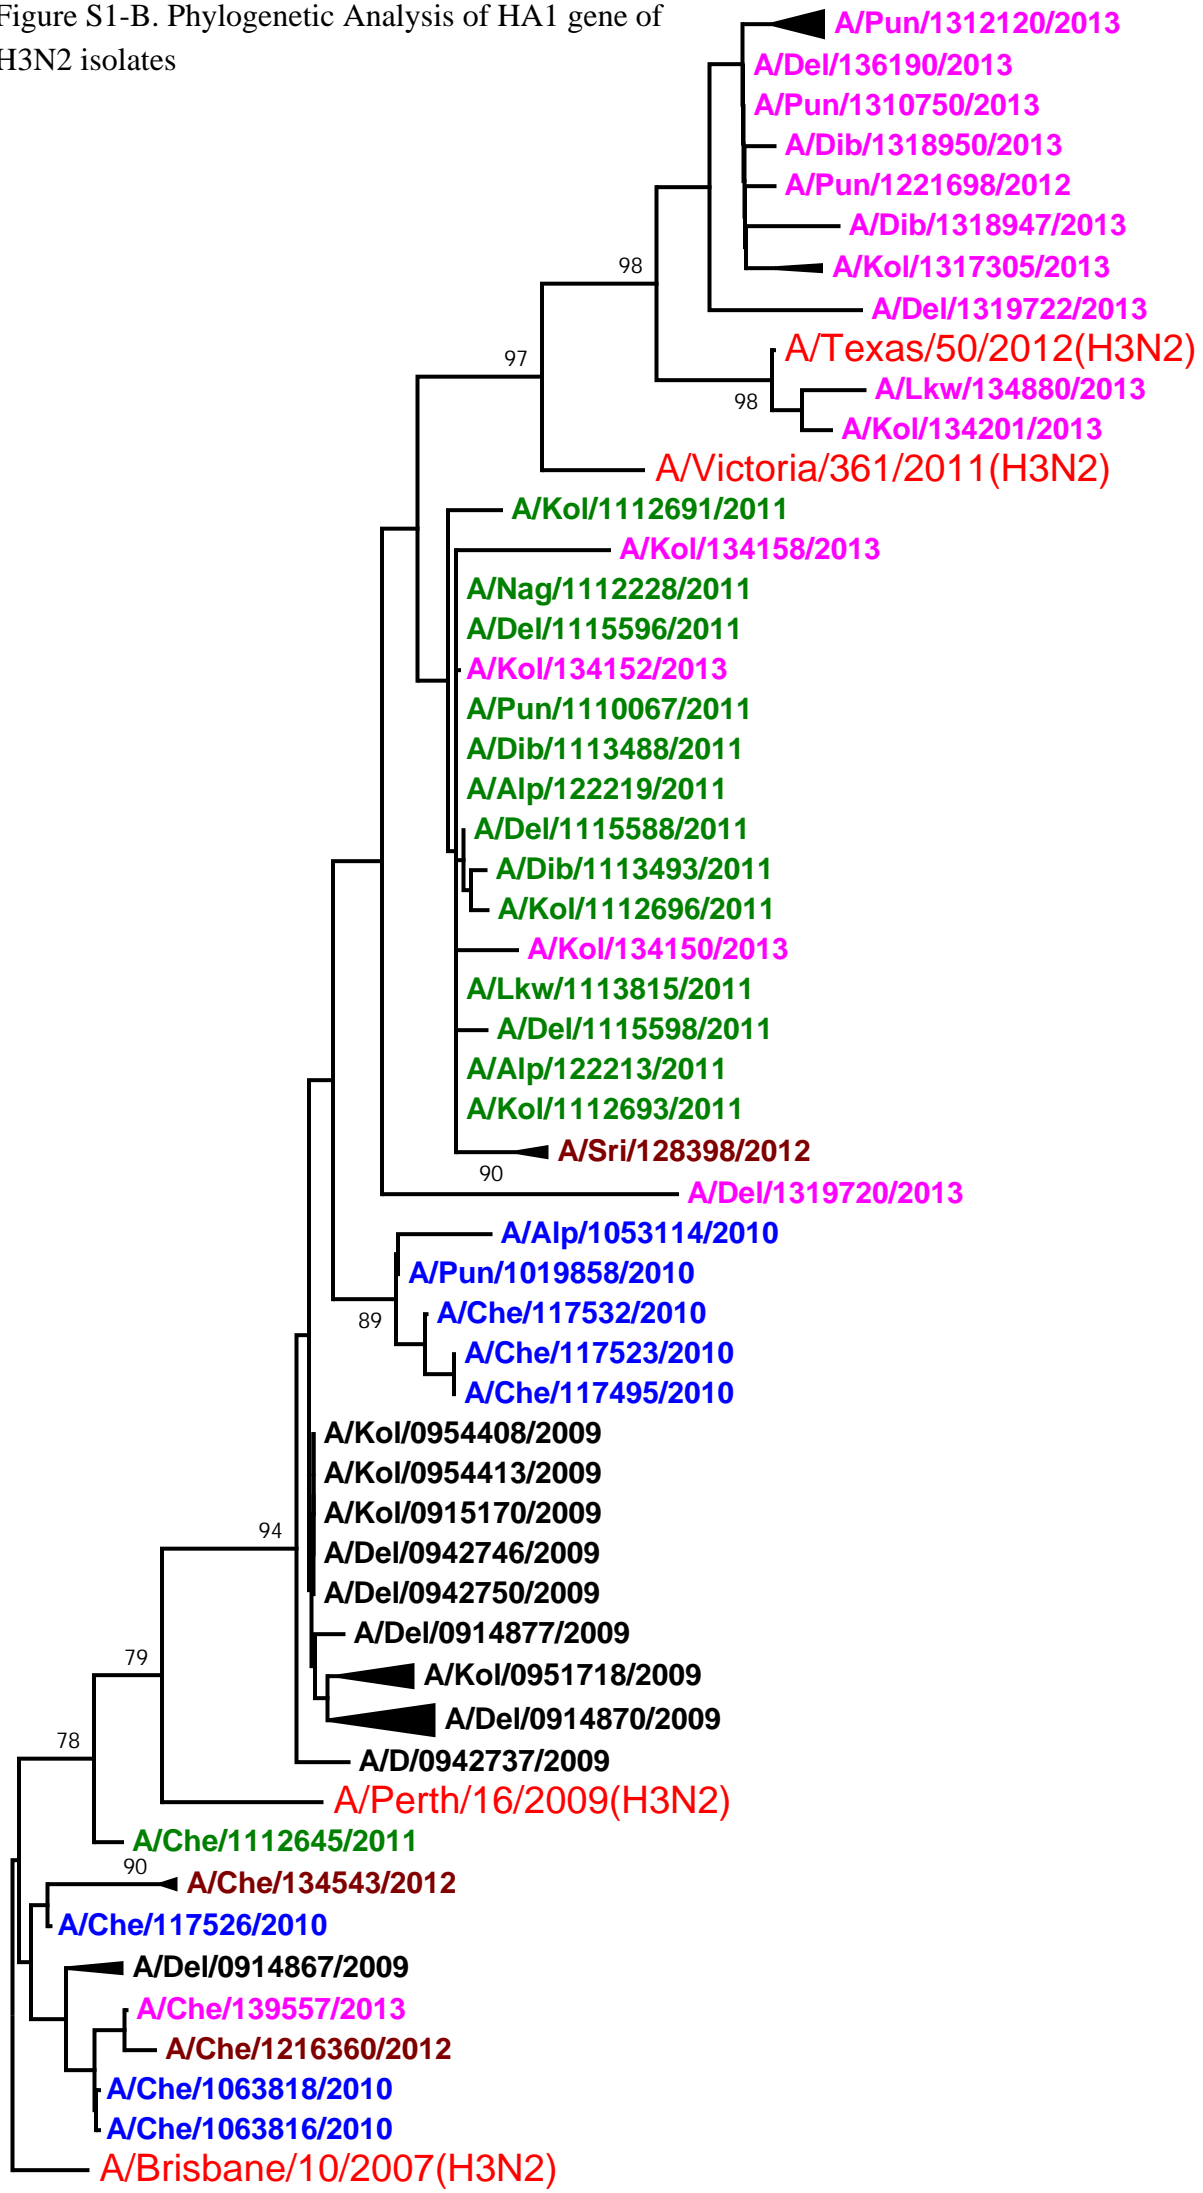

0.002

Figure S1-C. Phylogenetic Analysis of HA1 gene of A/H1N1psm09 isolates.

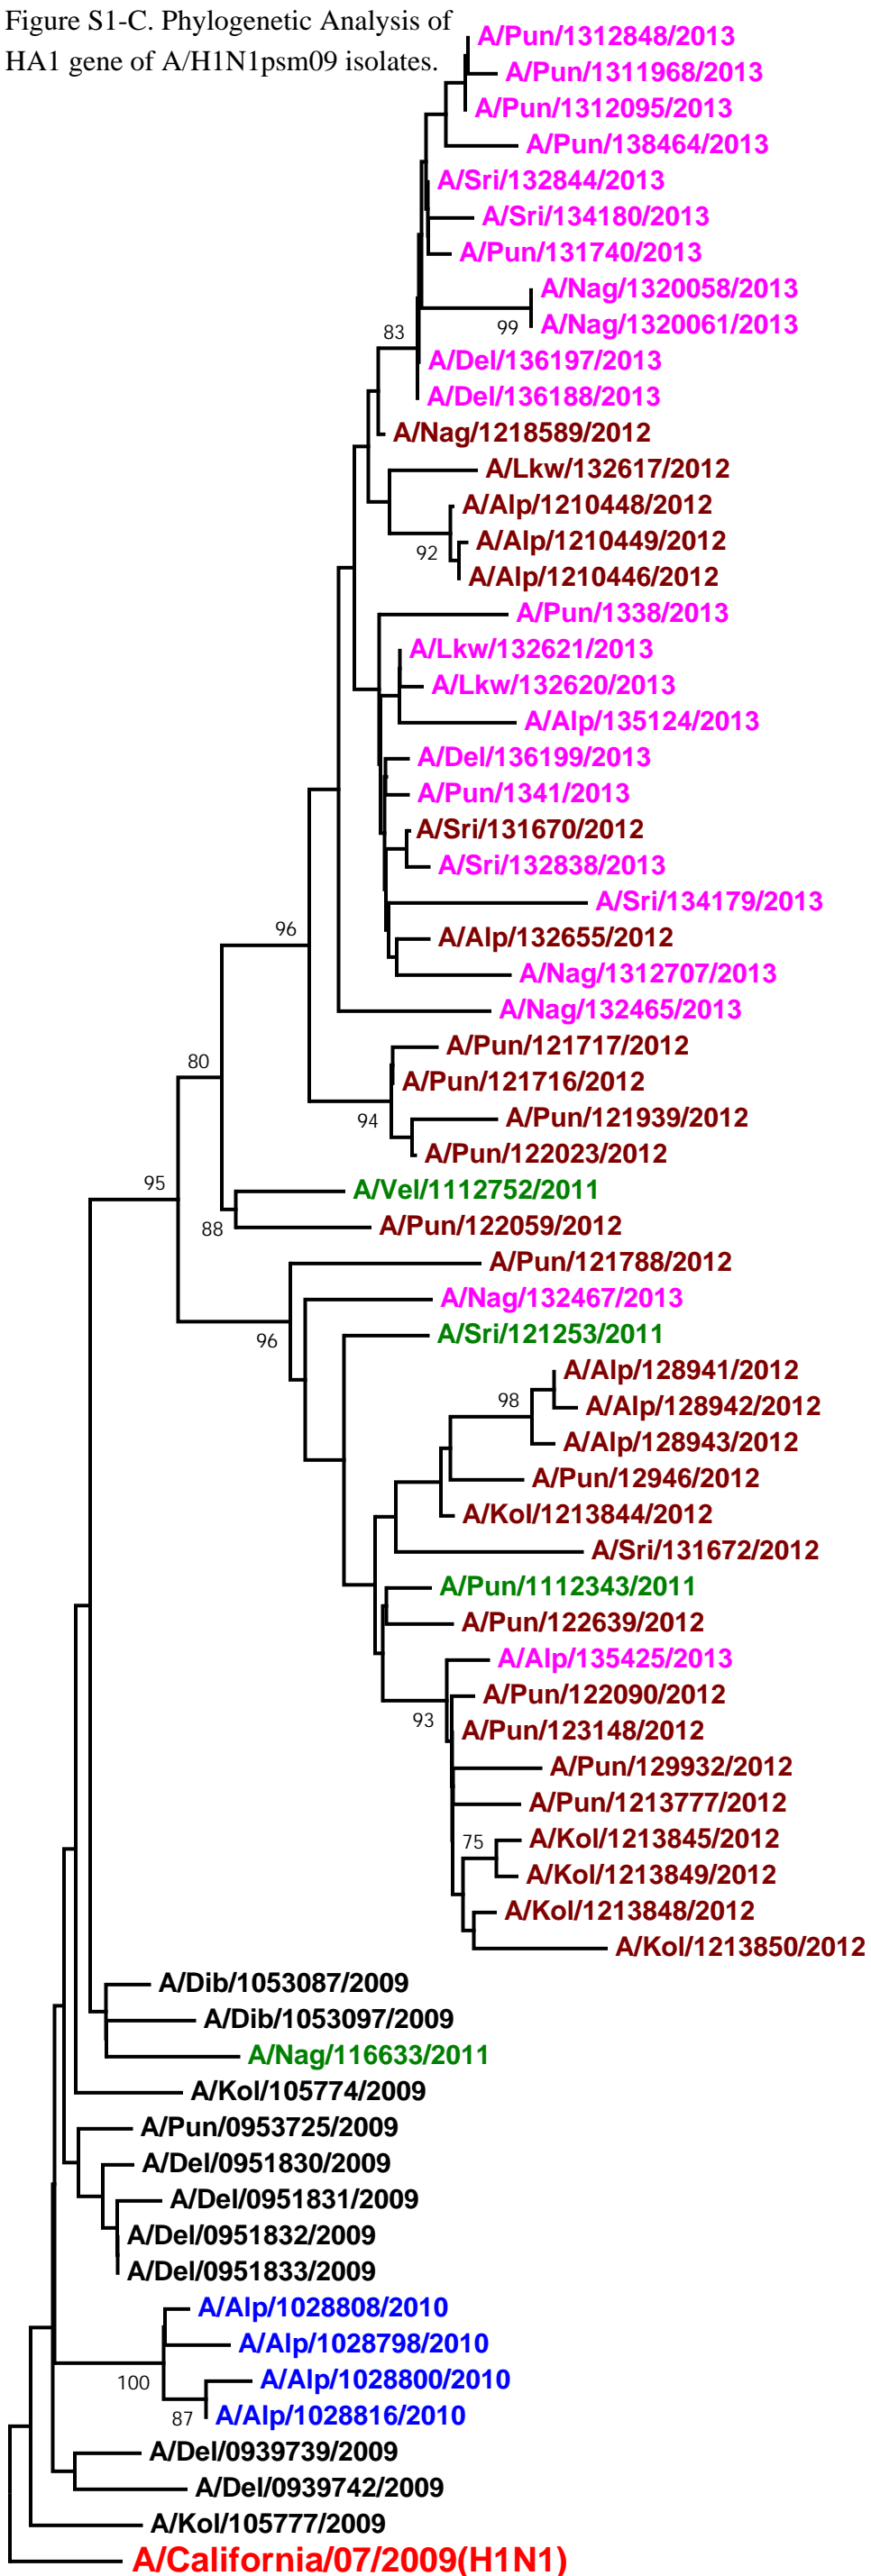

0.002

Figure S1-D. Phylogenetic Analysis of HA1 gene of Type B isolates.

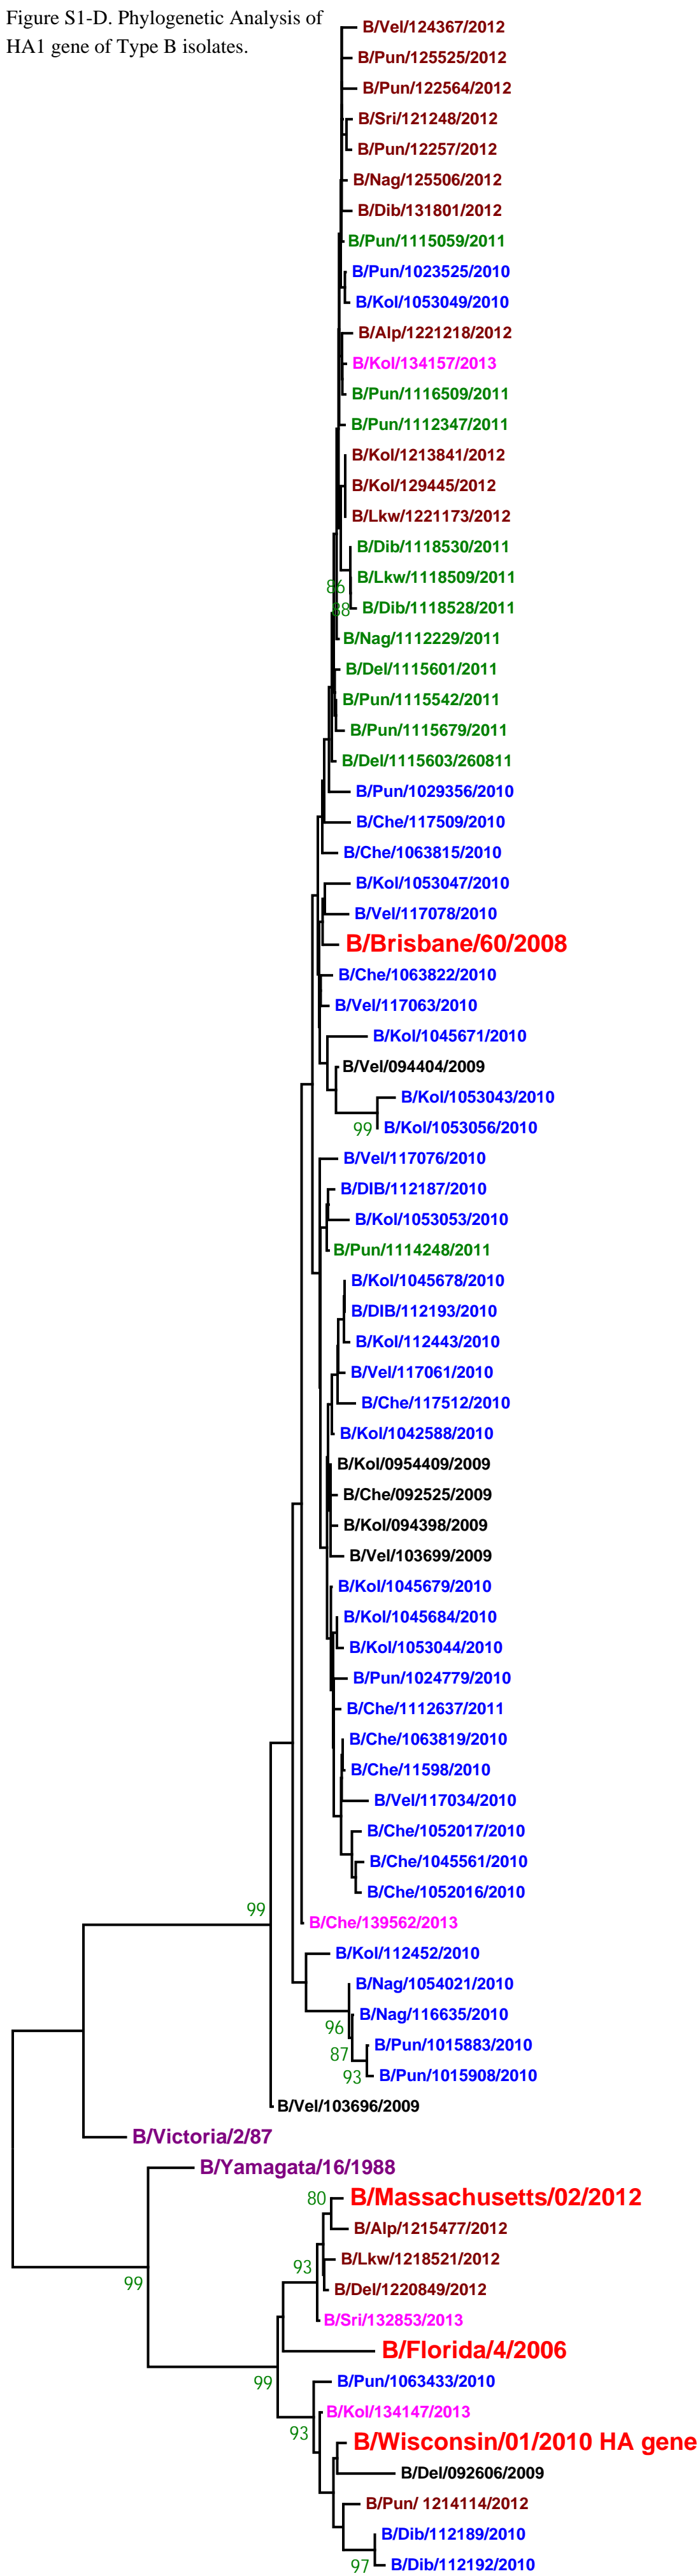

## Details of phylogenetic trees

- A. Phylogenetic Analysis of HA1 gene of seasonal A/H1N1 isolates
- B. Phylogenetic Analysis of HA1 gene of A/H3N2 isolates
- C. Phylogenetic Analysis of HA gene of A/H1N1pdm09 isolates
- D. Phylogenetic Analysis of HA1 gene of Type B isolates

### Taxon Name Color Coding

**Vaccine components**

2009 isolates, 2010 isolates, 2011 isolates, 2012 isolates, 2013 isolates
